# Supplementary material for: The Role of Brassica Bioactives on Human Health: Are We Studying It the Right Way?
Source: PubMed Central journal article supplement (PMC7180841; doi:10.3390/molecules25071591), 2020-03-30
Supplement: molecules-25-01591-s001.pdf [file molecules-25-01591-s001.pdf]

| <b>Supplementary Table S1. Short-time studies</b> |                                      |                                                                                                                  |                                        |                           |                                                                                                                                          |                                                                                                                                                            |
|---------------------------------------------------|--------------------------------------|------------------------------------------------------------------------------------------------------------------|----------------------------------------|---------------------------|------------------------------------------------------------------------------------------------------------------------------------------|------------------------------------------------------------------------------------------------------------------------------------------------------------|
| Reference                                         | Pathology                            | Type of Study                                                                                                    | Sample size                            | Time of evaluation (days) | Type of intervention                                                                                                                     | Variables under study                                                                                                                                      |
| (39)                                              | Prostate cancer                      | Randomized clinical study                                                                                        | N=45                                   | 21-28                     | DIM in dry formula 3 intervention groups (200 mg, 400mg and placebo)<br>-                                                                | Plasma and prostate DIM levels<br>Urinary 2OHE/16OHE.<br>PSA and testosterone level<br>IGF-1:IGFBP-3 ratio.<br>mRNA in CYPs                                |
| (40)                                              | Atypical Melanoma                    | Stratified and randomized clinical study                                                                         | N=17                                   | 28                        | 1 gel capsule of BSE-SFN.<br>3 groups: 50, 100 and 200 $\mu$ mol of BSE-SFN                                                              | Pictures, biopsy, SFN in skin and plasma, Plasma cytokines                                                                                                 |
| (41)                                              | Bronchospasm and airway inflammation | Double-blind placebo-control randomized clinical study                                                           | N=40                                   | 3                         | Broccoli sprouts (BS)<br>2 groups: 100 gr BS rich in SFN;<br>100gr alfalfa                                                               | FENO<br>Lung Function Test<br>Nasal epithelial cells, TSH values in urin and blood                                                                         |
| (42)                                              | COPD                                 | Double-blind multicenter randomized clinical study with control group of three arms for 2 concentrations of SFN. | N= 89                                  | 30                        | SFN capsules (BSE)<br>3 groups:<br>- BSE 4.4mg (25 $\mu$ mol SFN)<br>- BSE 26.6mg (150 $\mu$ mol SFN)<br>- Placebo: microcelulose        | NRF2 in macrophages and bronquial epithelium cells.<br>Concentration of antioxidants.<br>Inflammatory markers. Lung function and symptoms of the patients. |
| (43)                                              | Patients with Asthma                 | One arm clinical study without control group                                                                     | N=51, selected.<br>N=44 with data      | 14                        | 1 group before/after<br>20 mL bottles of mango juice + 100 $\mu$ mol of SFN dissolved; frozen, and ingested once a day in the afternoon. | Bronchoconstriction<br>Reduction of FEV1<br>Nfr2 factor activity                                                                                           |
| (44)                                              | Patients with T2DM                   | Double-blind randomized clinical study with control group                                                        | N=80<br>(N=63 at the end of the study) | 28                        | Broccoli sprouts (BS):<br>- 10 g/d BS: 225 $\mu$ mol SFN<br>- 5g/d BS : 112 $\mu$ mol SFN<br>- Placebo:corn flour with chlorophyll       | Fasting glucose levels<br>Insulin resistance<br>Serum insulin                                                                                              |

**Supplementary Table S2. Medium-length studies**

| Reference | Pathology                                     | Type of Study                                          | Sample size                                                                                                                                            | Time of evaluation (weeks) | Type of intervention                                                                                                                                | Variables under study                                                                                                                                                                                                                |
|-----------|-----------------------------------------------|--------------------------------------------------------|--------------------------------------------------------------------------------------------------------------------------------------------------------|----------------------------|-----------------------------------------------------------------------------------------------------------------------------------------------------|--------------------------------------------------------------------------------------------------------------------------------------------------------------------------------------------------------------------------------------|
| (45)      | Patients with recurrent CA and PSA (prostate) | One arm clinical study without control group.          | Initial N= 20<br>N= 16 finished the study.<br>N = 2 eliminated (Elevated PSA)<br>N= 2, dropped-out, GI secondary effects or did not follow the visits. | 20                         | 1 group<br>Capsules with 218 mg of SFN from Broccoli sprouts (200 µmol of SFN, 4 capsules, before breakfast, once a day)                            | Reduction of 50% of PSA levels after the 20 weeks.<br>Percentage change in PSA.<br>Changes in GSTM1.<br>Inhibition of HDAC<br>Time for double the PSA                                                                                |
| (46)      | CA in prostate after radical prostatectomy    | Double-blind placebo-control randomized clinical study | N=78 (6 months)<br>N=75 (8 months)                                                                                                                     | 32                         | Dosages of 10 mg SFN pills.<br>2 groups:<br>- 60 mg/d (2 pills/3 times/d x 24 weeks + 8 weeks of follow-up)<br>- Placebo: Same pills, no treatment. | Reduction of PSA.<br>Time to duplicate PSA.<br>Progression of PSA.<br>Differences in the adverse effects in the groups.                                                                                                              |
| (47)      | Non-invasive Breast cancer                    | Double-blind placebo-control randomized clinical study | N= 54                                                                                                                                                  | 8                          | SFN capsules<br>2 groups:<br>- 2 capsules/3 times/d (224 mg SFN/d)<br>- Placebo: microcrystalline cellulose                                         | Polls: family history and risk factors; food questionnaires.<br>Concentration of SFN metabolites in blood and urine.<br>Blood mononucleus cells. Histone deacetylase activity.<br>Markers: H3K18ac, H3K9ac, HDAC3, HDAC6, Ki-67, p21 |

**Supplementary Table S3. Long-term studies**

| Reference | Pathology                    | Type of Study                                                                                   | Sample size | Time of evaluation (Years) | Type of intervention                                                                                                                                                                                                                                                                                                                                                                                                                          | Variables under study                                                                                                        |
|-----------|------------------------------|-------------------------------------------------------------------------------------------------|-------------|----------------------------|-----------------------------------------------------------------------------------------------------------------------------------------------------------------------------------------------------------------------------------------------------------------------------------------------------------------------------------------------------------------------------------------------------------------------------------------------|------------------------------------------------------------------------------------------------------------------------------|
| (48)      | CA prostate                  | Double-blind randomized clinical study with placebo                                             | N= 21       | 1                          | 2 groups<br>- Infemin: 900mg DIM/d (3 capsules)<br>- Placebo                                                                                                                                                                                                                                                                                                                                                                                  | Morfological changes in prostate<br>Urodynamic parameters<br>GI symptoms<br>Erectyl disfunctions                             |
| (49)      | CA prostate                  | Clinical study upon pilot study (with healthy patient). Double-blind randomized clinical study. | N= 61       | 1                          | 3 Groups (Glucoraphanin – parental of SFN):<br>- X soup: Myb28 B/B broccoli genotype<br>- Y soup, Myb28 B/V (Myb28 allele introgressed from <i>B. villosa</i> )<br>- Z soup, Myb28V /V                                                                                                                                                                                                                                                        | Changes in genetic expression (RNA)<br>Metabolites in the biopsy of prostates<br>Blucose, PSA and Lipids in blood extraction |
| (37)      | Breast cancer                | Double-blind randomized clinical study with placeb                                              | N= 130      | 1                          | Diindolylmethane (DIM)+ tamoxifen<br>2 groups:<br>- 150 mg DIM/12 h<br>- Placebo                                                                                                                                                                                                                                                                                                                                                              | 2OHE1, and 16 $\alpha$ OHE1 levels and ratio<br>SHBG<br>Breast density                                                       |
| (50)      | Ovarian cancer               | Clinical study. Free election of treatment by the participant patients.                         | N= 284      | 5                          | Indole-3-carbinol (I3C) in combination with anticancer therapy (AT):<br>- N= 46; AT + 2 (oral 200 mg I3C), continued administration<br>- N= 76; AT + oral 200 mg I3C + 200 mg EGCG, twice daily, continued administration<br>- N: 42 AT + 2(200 mg I3C+ 200 mg EGCG), continued administration and long term chemotherapy (Platinum-taxane, 2-3 month periods)<br>- N: 40, combined treatment without chemotherapy<br>- N=80 combined therapy | Survival and survival free of cancer<br>CA-125, and PET-CT<br>MRI<br>Ultrasound graphics                                     |
| (51)      | Pancreatic cancer (terminal) | Monocentric Pilot study                                                                         | N= 40       | 1                          | 15 capsules of freeze-dried broccoli sprouts, once a day (90 mg SFN = 15 capsules of 400 mg of broccoli sprout powder , 6 mg each). And treatment with active chemotherapy.                                                                                                                                                                                                                                                                   | Serum CA19-9 and CEA<br>Image tests and Uring ITCs<br>Quality of life (validated scales)<br>Food questionnaires,             |

|      |                                 |                                                                               |                                      |    |                                                                                                                                                                            |                                                                                                                                                                                                                                                                                                                  |
|------|---------------------------------|-------------------------------------------------------------------------------|--------------------------------------|----|----------------------------------------------------------------------------------------------------------------------------------------------------------------------------|------------------------------------------------------------------------------------------------------------------------------------------------------------------------------------------------------------------------------------------------------------------------------------------------------------------|
| (52) | Pancreatic cancer (terminal)    | Randomized Clinical study with control group                                  | N= 40                                | 1  | 15 capsules of freeze-dried broccoli sprouts, once a day (90 mg SFN = 15 capsules of 400 mg of broccoli sprout powder , 6 mg each).<br>Treatment with active chemotherapy. | Therapeutic follow-up                                                                                                                                                                                                                                                                                            |
| (35) | Type 2 Diabetes Mellitus (T2DM) | Cohorts, prospective, patients free of cancer, T2DM or cardiovascular disease | N=200,907<br>(4,303,750 people-year) | 22 | Free living people with no specific intervention<br>3 cohorts<br>Food questionnaires (including the cruciferous foods)                                                     | Food frequency questionnaires, 9 categories, and registration of different habits:<br>Alcohol consumption; risk factors for T2DM, body weight, smoking, physical activity, prescription drugs, vitamin intake, family history of diabetes, chronic diseases, and physical activity evaluation on a weekly basis. |
